# Supplementary material for: Light-Dependent Activation of the GCN2 Kinase Under Cold and Salt Stress Is Mediated by the Photosynthetic Status of the Chloroplast
Source: PubMed Central journal article supplement (PMC7201089; doi:10.3389/fpls.2020.00431), 2020-04-29
Supplement: Data_Sheet_2.pdf [file Data_Sheet_2.pdf]

**A**

4°C Light (min)

*gcn2-1*

Wt (Ler)

+

ZT2

10

30

120

ZT2

10

30

120

eIF2 $\alpha$ -PeIF2 $\alpha$ 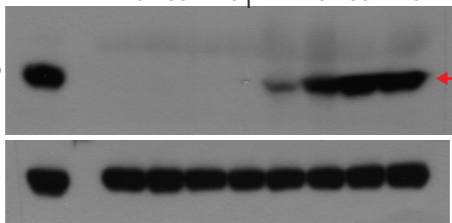**B**

22°C Light (min)

+

ZT2

10

30

120

eIF2 $\alpha$ -PeIF2 $\alpha$ 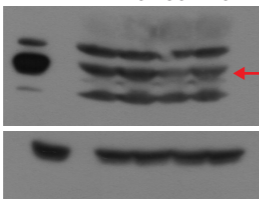**C**

4°C Dark (min)

+

0

10

30

120

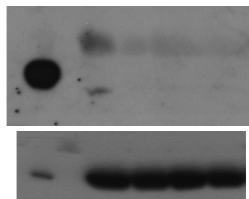

Original images of the blots supporting Figure 1. Please refer to the main text for explanation. Red arrow indicates the band for phosphorylated eIF2 $\alpha$ .

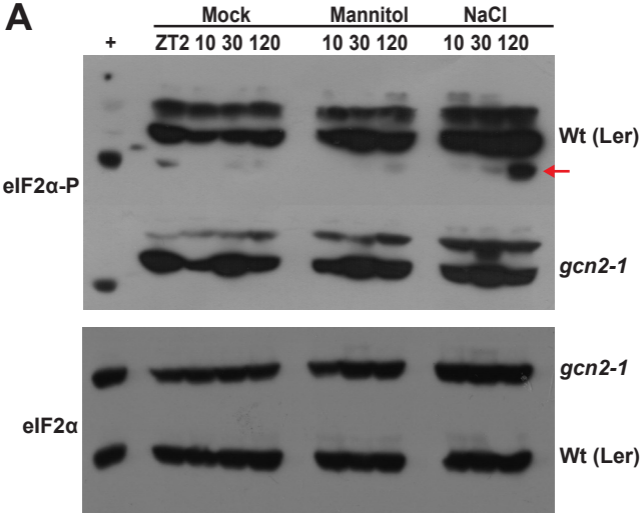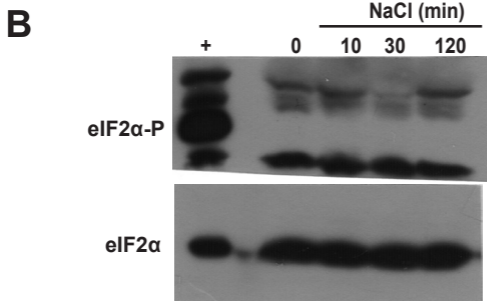

Original images of the blots supporting Figure 2. Please refer to the main text for explanation. Red arrow indicates the band for phosphorylated eIF2 $\alpha$ .

**Replicate 1****NaCl**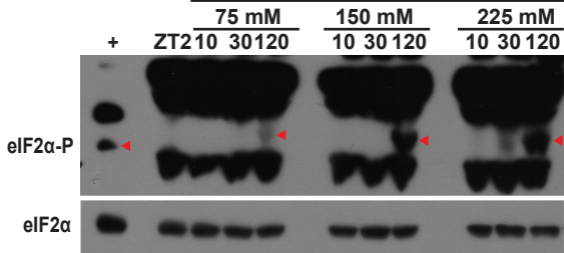**Replicate 2****NaCl**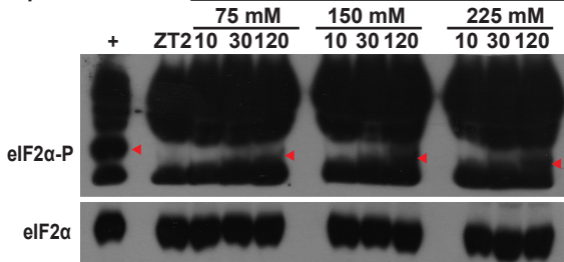

Original images of the blots supporting Figure 2B. Please refer to the main text for explanation. Red arrows indicate the band for phosphorylated eIF2 $\alpha$  (eIF2 $\alpha$ -P). Blots for unphosphorylated eIF2 $\alpha$  are shown below respective eIF2 $\alpha$ -P blots.

150mM NaCl (min)

Asc + GSH      Mock

0 10 30 120      10 30 120

Replicate 1 +

eIF2 $\alpha$ -P

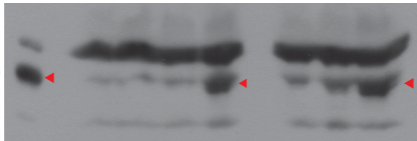

Replicate 2

eIF2 $\alpha$ -P

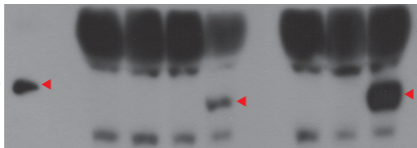

eIF2 $\alpha$

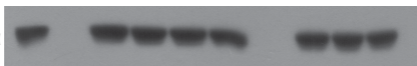

Replicate 3

eIF2 $\alpha$ -P

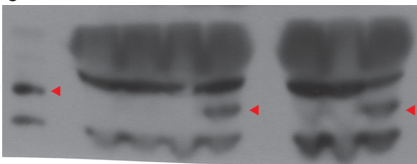

Original images of the immunoblots supporting Figure 3A. Please refer to the main text for explanation. Red arrows indicate the band for phosphorylated eIF2 $\alpha$  (eIF2 $\alpha$ -P). Immunoblot for unphosphorylated eIF2 $\alpha$  is shown below eIF2 $\alpha$ -P immunoblot for replicate 2.

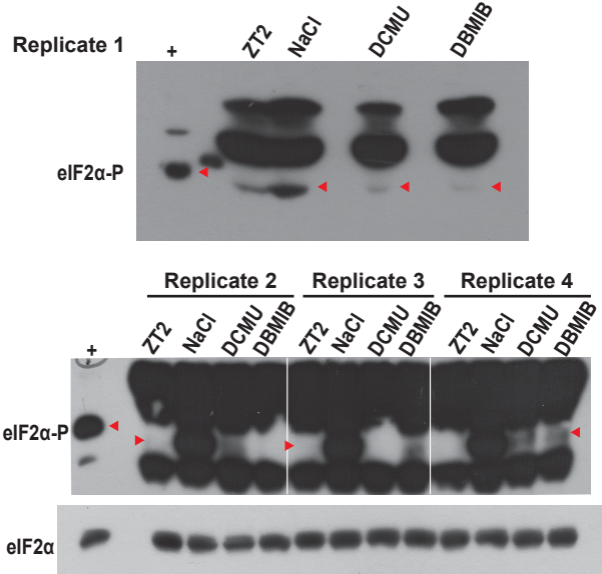

Original images of the immunoblots supporting Figure 3B. Please refer to the main text for explanation. Red arrows indicate the band for phosphorylated eIF2 $\alpha$  (eIF2 $\alpha$ -P). Immunoblot for unphosphorylated eIF2 $\alpha$  is shown below eIF2 $\alpha$ -P blot for replicate 2,3 and 4.

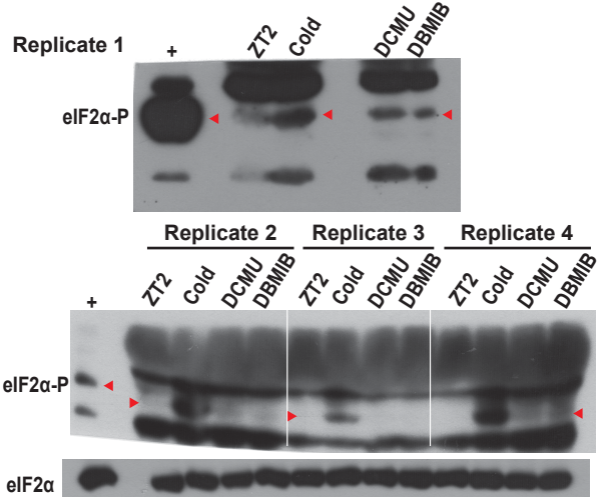

Original images of the immunoblots supporting Figure 3C. Please refer to the main text for explanation. Red arrows indicate the band for phosphorylated eIF2 $\alpha$  (-P). Immunoblot for unphosphorylated eIF2 $\alpha$  is shown below eIF2 $\alpha$ -P blot for replicate 2,3 and 4.
